# Supplementary material
Source: MDPI journal article supplement (https://www.mdpi.com/2073-4344/13/1/101)
Supplement: s1 [file s1]

# Supporting Information

## Selective furfuryl alcohol production from furfural via bio-electrocatalysis

Peng Zhan <sup>1,†</sup>, Xiangshi Liu <sup>2,†</sup>, Qian Zhu <sup>1</sup>, Hongqing Zhao <sup>1</sup>, Shiding Zhang <sup>1</sup>, Chenxi Zhang <sup>1</sup>, Cong Ren <sup>1</sup>, Jiawen Zhang <sup>1</sup>, Changwei Zhang <sup>1</sup>, Di Cai <sup>1,\*</sup>

<sup>1</sup> *National Energy R&D Center for Biorefinery, Beijing University of Chemical Technology, Beijing 100029, PR China*

<sup>2</sup> *College of Life Science and Technology, Beijing University of Chemical Technology, Beijing 100029, PR China*

<sup>†</sup> *Equal contributors*

<sup>\*</sup> Correspondence: caidibuct@163.com (D. Cai)

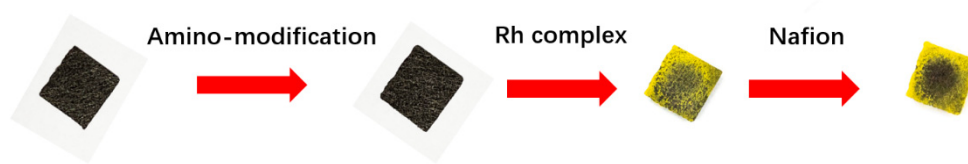

**Figure S1** Flowchart for the preparation of the Rh-complex fixed electrode.

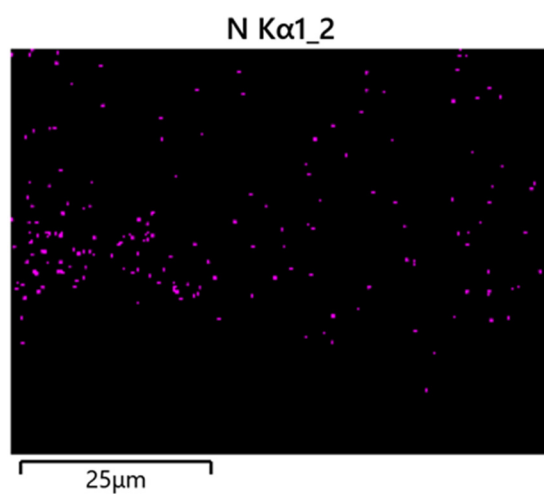

**Figure S2** Elemental mappings of the Rh-complex fixed electrode, and the purple dots represented the N element.

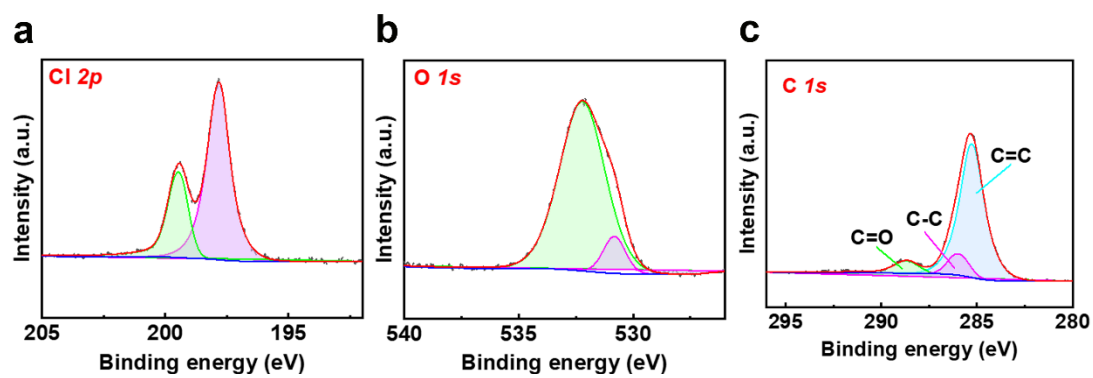

**Figure S3** XPS spectrum of (a) Cl 2*p*; (b) O 1*s*; and (c) C 1*s*.

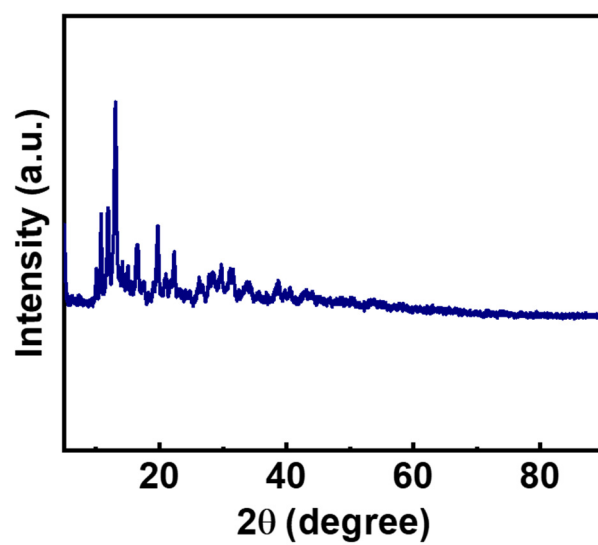

**Figure S4** XRD patterns of the Rh-complex.

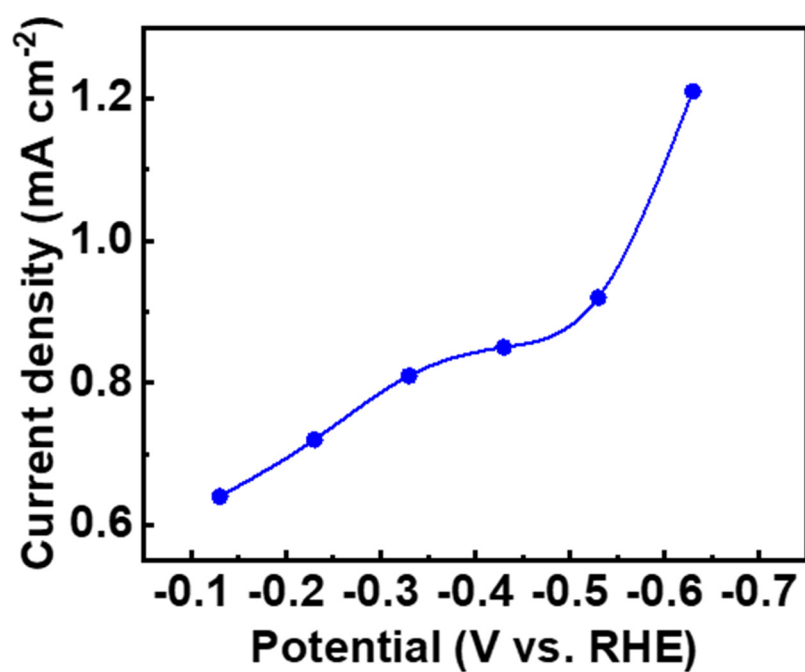

**Figure S5** The current densities of the bio-electrocatalytic hydrogenation of furfural under different applied potentials.

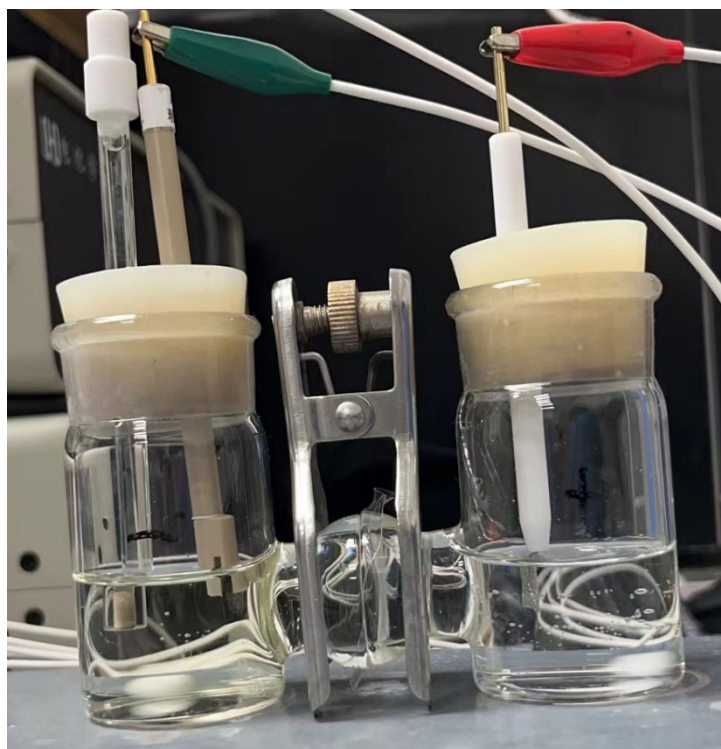

**Figure S6** The H-cell used in the bio-electrocatalytic hydrogenation of furfural.

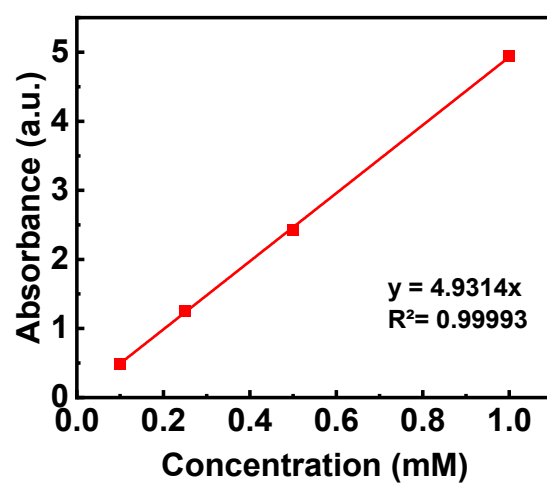

**Figure S7** UV-vis standard curve of NADH at 340 nm.



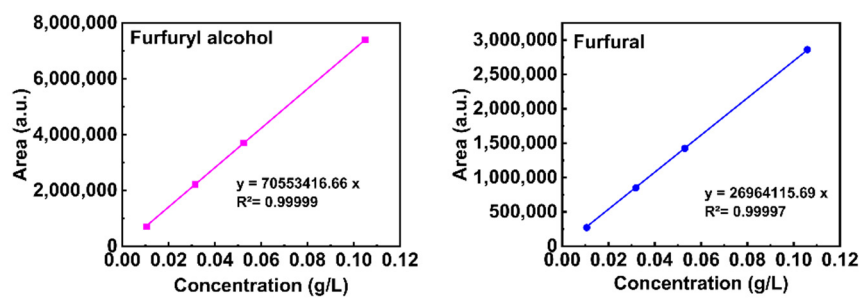

**Figure S8** HPLC standard curves of furfuryl alcohol and furfural.
